# Supplementary material for: Electrochemistry-based approaches to low cost, high sensitivity, automated, multiplexed protein immunoassays for cancer diagnostics
Source: Royal Society of Chemistry journal article supplement (doi:10.1039/c5an01829c), 2015-10-14
Supplement: c5an01829c1.pdf [file c5an01829c1.pdf]

## **Approaches to Low Cost, High Sensitivity, Automated, Multiplexed Protein Immunoassays for Cancer Diagnostics**

Chandra K. Dixit<sup>a</sup>, Karteek Kadimisetty<sup>a</sup>, Brunah A. Otieno<sup>a</sup>, Spundana Malla<sup>a</sup>, Chi Tang<sup>a</sup>, Colleen E. Krause<sup>b</sup>, James F. Rusling<sup>\*a,c,d,e</sup>

---

<sup>a</sup> *Department of Chemistry, University of Connecticut, 55 North Eagleville Road, Storrs, CT 06269, USA.*

<sup>b</sup> *Department of Chemistry, University of Hartford, West Hartford, CT 06117, USA.*

<sup>c</sup> *Department of Molecular and Cell Biology, University of Connecticut, Storrs, CT 06269, USA.*

<sup>d</sup> *School of Chemistry, National University of Ireland at Galway, Ireland.*

<sup>e</sup> *Institute of Materials Science, University of Connecticut, Storrs, Connecticut 06269, United States*

*\*Corresponding author: James.Rusling@uconn.edu*

**A**

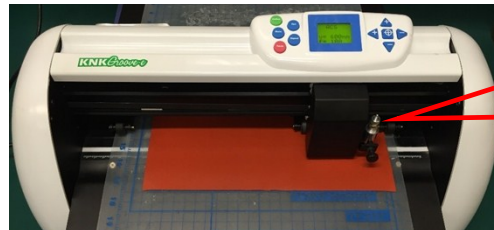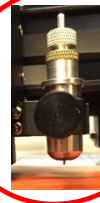

**Tiny sharp blade  
in casing**

**B Computer aided design patterned on silicone gasket  
and stainless steel shim**

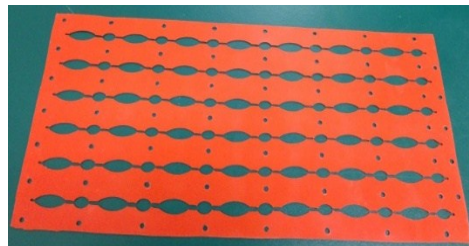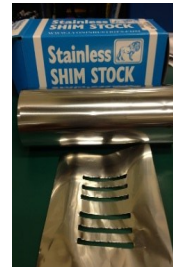

Figure 1. Accugraphic Klic-N-Kut (KNK) desktop craft cutter used in making microfluidic channels from silicone gasket, inset showing a blade holder with sharp blade used in cutting the channels. (B) Complex fluidic channels patterns were cut using this technique on silicone gasket and stainless steel metal shim.

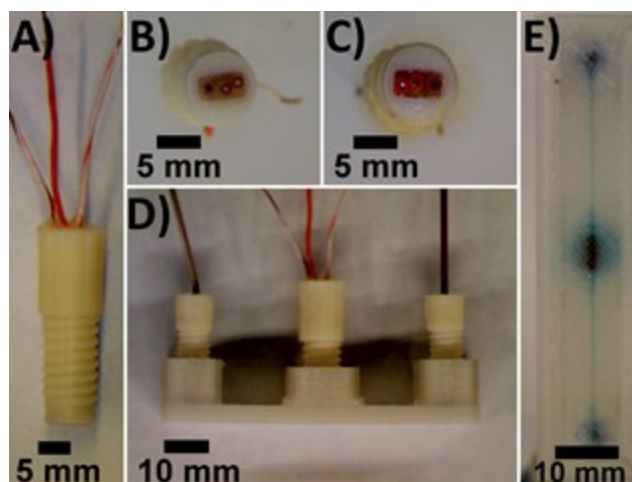

Figure 2. 3D-printed device with electrodes incorporated in fluidic channel. A) Side view of threaded ABS fitting with integrated electrodes. Bottom view of ABS fittings equipped with B) 0.5 mm Ag/AgCl reference, 0.25 mm Pt working, and 0.5 mm Au counter electrodes; and C) 0.25 mm Pt counter, 0.1 mm Au working, and 0.5 mm Ag/AgCl reference electrodes. Side (D) and bottom (E) views of 3D-printed PET device with electrodes integrated in fluidic channel that is filled with 0.1 mM methylene blue in 10 mM PBS, pH 7.4.
